# Supplementary material for: Application of a Combination of a Knowledge-Based Algorithm and 2-Stage Screening to Hypothesis-Free Genomic Data on Irinotecan-Treated Patients for Identification of a Candidate Single Nucleotide Polymorphism Related to an Adverse Effect
Source: PLoS One. 2014 Aug 15;9(8):e105160. doi: 10.1371/journal.pone.0105160 (PMC4134257; doi:10.1371/journal.pone.0105160)
Supplement: Table S2 — GO term list for transporter activity and the related functions. (XLS) [file pone.0105160.s002.xls]

## Sheet: TableS2
	Table S2
	GO ID	GO term
	GO:0005215	transporter activity
	GO:0000006	high affinity zinc uptake transmembrane transporter activity
	GO:0000007	low-affinity zinc ion transmembrane transporter activity
	GO:0000036	acyl carrier activity
	GO:0005324	long-chain fatty acid transporter activity
	GO:0000064	L-ornithine transmembrane transporter activity
	GO:0000095	S-adenosylmethionine transmembrane transporter activity
	GO:0000099	sulfur amino acid transmembrane transporter activity
	GO:0000100	S-methylmethionine transmembrane transporter activity
	GO:0000102	L-methionine secondary active transmembrane transporter activity
	GO:0000227	oxaloacetate secondary active transmembrane transporter activity
	GO:0005283	sodium:amino acid symporter activity
	GO:0005304	L-valine transmembrane transporter activity
	GO:0015188	L-isoleucine transmembrane transporter activity
	GO:0005337	nucleoside transmembrane transporter activity
	GO:0046961	proton-transporting ATPase activity, rotational mechanism
	GO:0046962	sodium-transporting ATPase activity, rotational mechanism
	GO:0000269	toxin export channel activity
	GO:0000295	adenine nucleotide transmembrane transporter activity
	GO:0000297	spermine transmembrane transporter activity
	GO:0000319	sulfite transmembrane transporter activity
	GO:0001406	glycerophosphodiester transmembrane transporter activity
	GO:0001409	guanine nucleotide transmembrane transporter activity
	GO:0005344	oxygen transporter activity
	GO:0001761	beta-alanine transmembrane transporter activity
	GO:0046933	hydrogen ion transporting ATP synthase activity, rotational mechanism
	GO:0003957	NAD(P)+ transhydrogenase (B-specific) activity
	GO:0019829	cation-transporting ATPase activity
	GO:0046873	metal ion transmembrane transporter activity
	GO:0004008	copper-exporting ATPase activity
	GO:0042626	ATPase activity, coupled to transmembrane movement of substances
	GO:0004012	phospholipid-translocating ATPase activity
	GO:0004129	cytochrome-c oxidase activity
	GO:0005381	iron ion transmembrane transporter activity
	GO:0004889	nicotinic acetylcholine-activated cation-selective channel activity
	GO:0004891	glycine-inhibited chloride channel activity
	GO:0004931	ATP-gated cation channel activity
	GO:0005216	ion channel activity
	GO:0005217	intracellular ligand-gated ion channel activity
	GO:0005218	intracellular ligand-gated calcium channel activity
	GO:0005219	ryanodine-sensitive calcium-release channel activity
	GO:0005220	inositol 1,4,5-trisphosphate-sensitive calcium-release channel activity
	GO:0005221	intracellular cyclic nucleotide activated cation channel activity
	GO:0005222	intracellular cAMP activated cation channel activity
	GO:0005223	intracellular cGMP activated cation channel activity
	GO:0005224	ATP-binding and phosphorylation-dependent chloride channel activity
	GO:0005225	volume-sensitive anion channel activity
	GO:0005227	calcium activated cation channel activity
	GO:0005228	intracellular sodium activated potassium channel activity
	GO:0005229	intracellular calcium activated chloride channel activity
	GO:0005230	extracellular ligand-gated ion channel activity
	GO:0005231	excitatory extracellular ligand-gated ion channel activity
	GO:0005232	serotonin-activated cation-selective channel activity
	GO:0005234	extracellular-glutamate-gated ion channel activity
	GO:0005237	inhibitory extracellular ligand-gated ion channel activity
	GO:0005242	inward rectifier potassium channel activity
	GO:0005243	gap junction channel activity
	GO:0005244	voltage-gated ion channel activity
	GO:0005245	voltage-gated calcium channel activity
	GO:0005247	voltage-gated chloride channel activity
	GO:0005248	voltage-gated sodium channel activity
	GO:0005249	voltage-gated potassium channel activity
	GO:0005250	A-type (transient outward) potassium channel activity
	GO:0005251	delayed rectifier potassium channel activity
	GO:0005252	open rectifier potassium channel activity
	GO:0005253	anion channel activity
	GO:0005254	chloride channel activity
	GO:0005260	channel-conductance-controlling ATPase activity
	GO:0005261	cation channel activity
	GO:0005262	calcium channel activity
	GO:0005267	potassium channel activity
	GO:0005272	sodium channel activity
	GO:0005274	allantoin uptake transmembrane transporter activity
	GO:0005275	amine transmembrane transporter activity
	GO:0005276	hydrogen:vesicular amine antiporter activity
	GO:0005277	acetylcholine transmembrane transporter activity
	GO:0005278	acetylcholine:hydrogen antiporter activity
	GO:0005280	hydrogen:amino acid symporter activity
	GO:0015171	amino acid transmembrane transporter activity
	GO:0005284	insulin-activated sodium:amino acid symporter activity
	GO:0005287	high affinity basic amino acid transmembrane transporter activity
	GO:0005289	high affinity arginine transmembrane transporter activity
	GO:0005290	L-histidine transmembrane transporter activity
	GO:0005291	high affinity L-histidine transmembrane transporter activity
	GO:0005292	high affinity lysine transmembrane transporter activity
	GO:0005294	neutral L-amino acid secondary active transmembrane transporter activity
	GO:0005295	neutral amino acid:sodium symporter activity
	GO:0005297	hydrogen:proline symporter activity
	GO:0005298	proline:sodium symporter activity
	GO:0005300	high-affinity tryptophan transmembrane transporter activity
	GO:0005302	L-tyrosine transmembrane transporter activity
	GO:0015196	L-tryptophan transmembrane transporter activity
	GO:0022857	transmembrane transporter activity
	GO:0005307	choline:sodium symporter activity
	GO:0005308	creatine transporter activity
	GO:0005309	creatine:sodium symporter activity
	GO:0005310	dicarboxylic acid transmembrane transporter activity
	GO:0005343	organic acid:sodium symporter activity
	GO:0015142	tricarboxylic acid transmembrane transporter activity
	GO:0005313	L-glutamate transmembrane transporter activity
	GO:0005314	high-affinity glutamate transmembrane transporter activity
	GO:0005315	inorganic phosphate transmembrane transporter activity
	GO:0005316	high affinity inorganic phosphate:sodium symporter activity
	GO:0015317	phosphate:hydrogen symporter activity
	GO:0005319	lipid transporter activity
	GO:0005325	peroxisomal fatty acyl CoA transporter activity
	GO:0005326	neurotransmitter transporter activity
	GO:0005328	neurotransmitter:sodium symporter activity
	GO:0005329	dopamine transmembrane transporter activity
	GO:0005330	dopamine:sodium symporter activity
	GO:0005332	gamma-aminobutyric acid:sodium symporter activity
	GO:0005333	norepinephrine transmembrane transporter activity
	GO:0005334	norephinephrine:sodium symporter activity
	GO:0005335	serotonin:sodium symporter activity
	GO:0005338	nucleotide-sugar transmembrane transporter activity
	GO:0005340	nucleotide-sulfate transmembrane transporter activity
	GO:0005342	organic acid transmembrane transporter activity
	GO:0005345	purine transmembrane transporter activity
	GO:0005346	purine ribonucleotide transmembrane transporter activity
	GO:0005347	ATP transmembrane transporter activity
	GO:0005350	pyrimidine transmembrane transporter activity
	GO:0005351	sugar:hydrogen symporter activity
	GO:0005352	alpha-glucoside:hydrogen symporter activity
	GO:0005353	fructose transmembrane transporter activity
	GO:0005354	galactose transmembrane transporter activity
	GO:0005355	glucose transmembrane transporter activity
	GO:0005356	hydrogen:glucose symporter activity
	GO:0005357	constitutive hydrogen:glucose symporter activity
	GO:0005358	high-affinity hydrogen:glucose symporter activity
	GO:0005359	low-affinity hydrogen:glucose symporter activity
	GO:0005360	insulin-responsive hydrogen:glucose symporter activity
	GO:0005361	transepithelial hydrogen:glucose symporter activity
	GO:0005362	low-affinity glucose:sodium symporter activity
	GO:0005363	maltose transmembrane transporter activity
	GO:0005364	maltose:hydrogen symporter activity
	GO:0005365	myo-inositol transmembrane transporter activity
	GO:0005366	myo-inositol:hydrogen symporter activity
	GO:0005367	myo-inositol:sodium symporter activity
	GO:0005368	taurine transmembrane transporter activity
	GO:0005369	taurine:sodium symporter activity
	GO:0005371	tricarboxylate secondary active transmembrane transporter activity
	GO:0005372	water transporter activity
	GO:0015291	secondary active transmembrane transporter activity
	GO:0005375	copper ion transmembrane transporter activity
	GO:0005384	manganese ion transmembrane transporter activity
	GO:0005385	zinc ion transmembrane transporter activity
	GO:0005388	calcium-transporting ATPase activity
	GO:0005391	sodium:potassium-exchanging ATPase activity
	GO:0005395	eye pigment precursor transporter activity
	GO:0005402	cation:sugar symporter activity
	GO:0005412	glucose:sodium symporter activity
	GO:0005415	nucleoside:sodium symporter activity
	GO:0005416	cation:amino acid symporter activity
	GO:0005427	proton-dependent oligopeptide secondary active transmembrane transporter activity
	GO:0005429	chromaffin granule amine transmembrane transporter activity
	GO:0005430	synaptic vesicle amine transmembrane transporter activity
	GO:0005432	calcium:sodium antiporter activity
	GO:0005436	sodium:phosphate symporter activity
	GO:0005451	monovalent cation:hydrogen antiporter activity
	GO:0005452	inorganic anion exchanger activity
	GO:0005456	CMP-sialic acid transmembrane transporter activity
	GO:0005457	GDP-fucose transmembrane transporter activity
	GO:0005458	GDP-mannose transmembrane transporter activity
	GO:0005459	UDP-galactose transmembrane transporter activity
	GO:0005460	UDP-glucose transmembrane transporter activity
	GO:0005461	UDP-glucuronic acid transmembrane transporter activity
	GO:0005462	UDP-N-acetylglucosamine transmembrane transporter activity
	GO:0005463	UDP-N-acetylgalactosamine transmembrane transporter activity
	GO:0005464	UDP-xylose transmembrane transporter activity
	GO:0005469	succinate:fumarate antiporter activity
	GO:0005471	ATP:ADP antiporter activity
	GO:0005472	FAD carrier activity
	GO:0005476	carnitine:acyl carnitine antiporter activity
	GO:0005477	pyruvate secondary active transmembrane transporter activity
	GO:0005487	nucleocytoplasmic transporter activity
	GO:0005548	phospholipid transporter activity
	GO:0015367	oxoglutarate:malate antiporter activity
	GO:0008028	monocarboxylic acid transmembrane transporter activity
	GO:0008068	extracellular-glutamate-gated chloride channel activity
	GO:0008086	light-activated voltage-gated calcium channel activity
	GO:0008121	ubiquinol-cytochrome-c reductase activity
	GO:0008262	importin-alpha export receptor activity
	GO:0008271	secondary active sulfate transmembrane transporter activity
	GO:0008273	calcium, potassium:sodium antiporter activity
	GO:0008308	voltage-gated anion channel activity
	GO:0008320	protein transmembrane transporter activity
	GO:0008324	cation transmembrane transporter activity
	GO:0008331	high voltage-gated calcium channel activity
	GO:0008332	low voltage-gated calcium channel activity
	GO:0008381	mechanically-gated ion channel activity
	GO:0008490	arsenite secondary active transmembrane transporter activity
	GO:0008493	tetracycline transporter activity
	GO:0008504	monoamine transmembrane transporter activity
	GO:0008506	sucrose:hydrogen symporter activity
	GO:0008507	sodium:iodide symporter activity
	GO:0008508	bile acid:sodium symporter activity
	GO:0008509	anion transmembrane transporter activity
	GO:0008510	sodium:bicarbonate symporter activity
	GO:0008511	sodium:potassium:chloride symporter activity
	GO:0008512	sulfate:hydrogen symporter activity
	GO:0008513	secondary active organic cation transmembrane transporter activity
	GO:0008514	organic anion transmembrane transporter activity
	GO:0008515	sucrose transmembrane transporter activity
	GO:0008516	hexose uniporter activity
	GO:0008517	folic acid transporter activity
	GO:0008518	reduced folate carrier activity
	GO:0008519	ammonium transmembrane transporter activity
	GO:0008520	L-ascorbate:sodium symporter activity
	GO:0008521	acetyl-CoA transporter activity
	GO:0008523	sodium-dependent multivitamin transmembrane transporter activity
	GO:0008524	glucose 6-phosphate:phosphate antiporter activity
	GO:0008525	phosphatidylcholine transmembrane transporter activity
	GO:0008526	phosphatidylinositol transporter activity
	GO:0008551	cadmium-exporting ATPase activity
	GO:0015086	cadmium ion transmembrane transporter activity
	GO:0015087	cobalt ion transmembrane transporter activity
	GO:0015094	lead ion transmembrane transporter activity
	GO:0015099	nickel ion transmembrane transporter activity
	GO:0015662	ATPase activity, coupled to transmembrane movement of ions, phosphorylative mechanism
	GO:0008553	hydrogen-exporting ATPase activity, phosphorylative mechanism
	GO:0008554	sodium-exporting ATPase activity, phosphorylative mechanism
	GO:0008555	chloride-transporting ATPase activity
	GO:0008556	potassium-transporting ATPase activity
	GO:0008558	guanine-transporting ATPase activity
	GO:0008559	xenobiotic-transporting ATPase activity
	GO:0008564	protein-exporting ATPase activity
	GO:0008565	protein transporter activity
	GO:0008566	mitochondrial protein-transporting ATPase activity
	GO:0008900	hydrogen:potassium-exchanging ATPase activity
	GO:0008982	protein-N(PI)-phosphohistidine-sugar phosphotransferase activity
	GO:0009669	sucrose:monovalent cation symporter activity
	GO:0009670	triose-phosphate transmembrane transporter activity
	GO:0009671	nitrate:hydrogen symporter activity
	GO:0009672	auxin:hydrogen symporter activity
	GO:0009673	low affinity phosphate transmembrane transporter activity
	GO:0009674	potassium:sodium symporter activity
	GO:0009675	high affinity sulfate:hydrogen symporter activity
	GO:0009676	low affinity sulfate:hydrogen symporter activity
	GO:0009678	hydrogen-translocating pyrophosphatase activity
	GO:0009679	hexose:hydrogen symporter activity
	GO:0009977	proton motive force dependent protein transmembrane transporter activity
	GO:0010174	nucleoside transmembrane transporter activity, against a concentration gradient
	GO:0010175	sphingosine transmembrane transporter activity
	GO:0010290	chlorophyll catabolite transporter activity
	GO:0010292	GTP:GDP antiporter activity
	GO:0010328	auxin influx transmembrane transporter activity
	GO:0010329	auxin efflux transmembrane transporter activity
	GO:0010348	lithium:hydrogen antiporter activity
	GO:0010461	light-activated channel activity
	GO:0010486	manganese:hydrogen antiporter activity
	GO:0010542	nitrate efflux transmembrane transporter activity
	GO:0015075	ion transmembrane transporter activity
	GO:0015077	monovalent inorganic cation transmembrane transporter activity
	GO:0015078	hydrogen ion transmembrane transporter activity
	GO:0015079	potassium ion transmembrane transporter activity
	GO:0015080	silver ion transmembrane transporter activity
	GO:0015081	sodium ion transmembrane transporter activity
	GO:0015082	di-, tri-valent inorganic cation transmembrane transporter activity
	GO:0015083	aluminum ion transmembrane transporter activity
	GO:0015085	calcium ion transmembrane transporter activity
	GO:0015088	copper uptake transmembrane transporter activity
	GO:0015089	high affinity copper ion transmembrane transporter activity
	GO:0015090	low affinity iron ion transmembrane transporter activity
	GO:0015091	ferric iron transmembrane transporter activity
	GO:0015092	high affinity ferric uptake transmembrane transporter activity
	GO:0015093	ferrous iron transmembrane transporter activity
	GO:0015095	magnesium ion transmembrane transporter activity
	GO:0015097	mercury ion transmembrane transporter activity
	GO:0015098	molybdate ion transmembrane transporter activity
	GO:0015100	vanadium ion transmembrane transporter activity
	GO:0015101	organic cation transmembrane transporter activity
	GO:0015103	inorganic anion transmembrane transporter activity
	GO:0015104	antimonite transmembrane transporter activity
	GO:0015105	arsenite transmembrane transporter activity
	GO:0015106	bicarbonate transmembrane transporter activity
	GO:0015107	chlorate transmembrane transporter activity
	GO:0015108	chloride transmembrane transporter activity
	GO:0015109	chromate transmembrane transporter activity
	GO:0015110	cyanate transmembrane transporter activity
	GO:0015111	iodide transmembrane transporter activity
	GO:0015112	nitrate transmembrane transporter activity
	GO:0015113	nitrite transmembrane transporter activity
	GO:0015114	phosphate transmembrane transporter activity
	GO:0015115	silicate transmembrane transporter activity
	GO:0015116	sulfate transmembrane transporter activity
	GO:0015117	thiosulfate transmembrane transporter activity
	GO:0015118	tellurite transmembrane transporter activity
	GO:0015119	hexose phosphate transmembrane transporter activity
	GO:0015120	phosphoglycerate transmembrane transporter activity
	GO:0015121	phosphoenolpyruvate transmembrane transporter activity
	GO:0015123	acetate transmembrane transporter activity
	GO:0015124	allantoate transmembrane transporter activity
	GO:0015125	bile acid transmembrane transporter activity
	GO:0015126	canalicular bile acid transmembrane transporter activity
	GO:0015127	bilirubin transmembrane transporter activity
	GO:0015128	gluconate transmembrane transporter activity
	GO:0015129	lactate transmembrane transporter activity
	GO:0015130	mevalonate transmembrane transporter activity
	GO:0015131	oxaloacetate transmembrane transporter activity
	GO:0015132	prostaglandin transmembrane transporter activity
	GO:0015133	uronic acid transmembrane transporter activity
	GO:0015134	hexuronate transmembrane transporter activity
	GO:0015135	glucuronate transmembrane transporter activity
	GO:0015136	sialic acid transmembrane transporter activity
	GO:0015137	citrate transmembrane transporter activity
	GO:0015138	fumarate transmembrane transporter activity
	GO:0015139	alpha-ketoglutarate transmembrane transporter activity
	GO:0015140	malate transmembrane transporter activity
	GO:0015141	succinate transmembrane transporter activity
	GO:0015143	urate transmembrane transporter activity
	GO:0015144	carbohydrate transmembrane transporter activity
	GO:0015145	monosaccharide transmembrane transporter activity
	GO:0015146	pentose transmembrane transporter activity
	GO:0015147	L-arabinose transmembrane transporter activity
	GO:0015148	D-xylose transmembrane transporter activity
	GO:0015149	hexose transmembrane transporter activity
	GO:0015150	fucose transmembrane transporter activity
	GO:0015151	alpha-glucoside transmembrane transporter activity
	GO:0015152	glucose-6-phosphate transmembrane transporter activity
	GO:0015153	rhamnose transmembrane transporter activity
	GO:0015154	disaccharide transmembrane transporter activity
	GO:0015155	lactose transmembrane transporter activity
	GO:0015156	melibiose transmembrane transporter activity
	GO:0015157	oligosaccharide transmembrane transporter activity
	GO:0015158	raffinose transmembrane transporter activity
	GO:0015159	polysaccharide transmembrane transporter activity
	GO:0015160	beta-glucan transmembrane transporter activity
	GO:0015161	capsular-polysaccharide transmembrane transporter activity
	GO:0015162	teichoic acid transmembrane transporter activity
	GO:0015163	hexuronide transmembrane transporter activity
	GO:0015164	glucuronoside transmembrane transporter activity
	GO:0015165	pyrimidine nucleotide sugar transmembrane transporter activity
	GO:0015166	polyol transmembrane transporter activity
	GO:0015167	arabitol transmembrane transporter activity
	GO:0015168	glycerol transmembrane transporter activity
	GO:0015169	glycerol-3-phosphate transmembrane transporter activity
	GO:0015170	propanediol transmembrane transporter activity
	GO:0015172	acidic amino acid transmembrane transporter activity
	GO:0015173	aromatic amino acid transmembrane transporter activity
	GO:0015174	basic amino acid transmembrane transporter activity
	GO:0015175	neutral amino acid transmembrane transporter activity
	GO:0015179	L-amino acid transmembrane transporter activity
	GO:0015180	L-alanine transmembrane transporter activity
	GO:0015181	arginine transmembrane transporter activity
	GO:0015182	L-asparagine transmembrane transporter activity
	GO:0015183	L-aspartate transmembrane transporter activity
	GO:0015184	L-cystine transmembrane transporter activity
	GO:0015185	L-gamma-aminobutyric acid transmembrane transporter activity
	GO:0015186	L-glutamine transmembrane transporter activity
	GO:0015187	glycine transmembrane transporter activity
	GO:0015189	L-lysine transmembrane transporter activity
	GO:0015190	L-leucine transmembrane transporter activity
	GO:0015191	L-methionine transmembrane transporter activity
	GO:0015192	L-phenylalanine transmembrane transporter activity
	GO:0015193	L-proline transmembrane transporter activity
	GO:0015194	L-serine transmembrane transporter activity
	GO:0015195	L-threonine transmembrane transporter activity
	GO:0015197	peptide transporter activity
	GO:0015198	oligopeptide transporter activity
	GO:0015199	betaine transmembrane transporter activity
	GO:0015200	methylammonium transmembrane transporter activity
	GO:0015203	polyamine transmembrane transporter activity
	GO:0015204	urea transmembrane transporter activity
	GO:0015205	nucleobase transmembrane transporter activity
	GO:0015207	adenine transmembrane transporter activity
	GO:0015208	guanine transmembrane transporter activity
	GO:0015209	cytosine transmembrane transporter activity
	GO:0015210	uracil transmembrane transporter activity
	GO:0015211	purine nucleoside transmembrane transporter activity
	GO:0015212	cytidine transmembrane transporter activity
	GO:0015213	uridine transmembrane transporter activity
	GO:0015214	pyrimidine nucleoside transmembrane transporter activity
	GO:0015215	nucleotide transmembrane transporter activity
	GO:0015216	purine nucleotide transmembrane transporter activity
	GO:0015217	ADP transmembrane transporter activity
	GO:0015218	pyrimidine nucleotide transmembrane transporter activity
	GO:0015219	protein-DNA complex transmembrane transporter activity
	GO:0015220	choline transmembrane transporter activity
	GO:0015221	lipopolysaccharide transmembrane transporter activity
	GO:0015222	serotonin transmembrane transporter activity
	GO:0051183	vitamin transporter activity
	GO:0051184	cofactor transporter activity
	GO:0015224	biopterin transporter activity
	GO:0015225	biotin transporter activity
	GO:0015226	carnitine transporter activity
	GO:0015227	acyl carnitine transporter activity
	GO:0015228	coenzyme A transmembrane transporter activity
	GO:0015229	L-ascorbic acid transporter activity
	GO:0015230	FAD transmembrane transporter activity
	GO:0015231	5-formyltetrahydrofolate transporter activity
	GO:0015232	heme transporter activity
	GO:0015233	pantothenate transporter activity
	GO:0015234	thiamin transmembrane transporter activity
	GO:0015235	cobalamin transporter activity
	GO:0015238	drug transporter activity
	GO:0015239	multidrug transporter activity
	GO:0015240	amiloride transporter activity
	GO:0015241	aminotriazole transporter activity
	GO:0015242	benomyl transporter activity
	GO:0015243	cycloheximide transporter activity
	GO:0015244	fluconazole transporter activity
	GO:0015245	fatty acid transporter activity
	GO:0015246	fatty acyl transporter activity
	GO:0015247	aminophospholipid transporter activity
	GO:0015248	sterol transporter activity
	GO:0015250	water channel activity
	GO:0015251	ammonium channel activity
	GO:0015252	hydrogen ion channel activity
	GO:0051119	sugar transmembrane transporter activity
	GO:0015254	glycerol channel activity
	GO:0015255	propanediol channel activity
	GO:0042887	amide transporter activity
	GO:0015264	methylammonium channel activity
	GO:0015265	urea channel activity
	GO:0015266	protein channel activity
	GO:0015267	channel activity
	GO:0015269	calcium-activated potassium channel activity
	GO:0015270	dihydropyridine-sensitive calcium channel activity
	GO:0015271	outward rectifier potassium channel activity
	GO:0015272	ATP-activated inward rectifier potassium channel activity
	GO:0015274	organellar voltage-gated chloride channel activity
	GO:0015275	stretch-activated, cation-selective, calcium channel activity
	GO:0015276	ligand-gated ion channel activity
	GO:0015278	calcium-release channel activity
	GO:0015279	store-operated calcium channel activity
	GO:0015280	amiloride-sensitive sodium channel activity
	GO:0015284	fructose uniporter activity
	GO:0015288	porin activity
	GO:0015292	uniporter activity
	GO:0015293	symporter activity
	GO:0015294	solute:cation symporter activity
	GO:0015295	solute:hydrogen symporter activity
	GO:0015296	anion:cation symporter activity
	GO:0015297	antiporter activity
	GO:0015298	solute:cation antiporter activity
	GO:0015299	solute:hydrogen antiporter activity
	GO:0015300	solute:solute antiporter activity
	GO:0015301	anion:anion antiporter activity
	GO:0015304	glucose uniporter activity
	GO:0050782	galactose uniporter activity
	GO:0015517	galactose:hydrogen symporter activity
	GO:0015528	lactose:hydrogen symporter activity
	GO:0015306	sialate:cation symporter activity
	GO:0015307	drug:hydrogen antiporter activity
	GO:0015308	amiloride:hydrogen antiporter activity
	GO:0015309	cycloheximide:hydrogen antiporter activity
	GO:0015310	benomyl:hydrogen antiporter activity
	GO:0015311	monoamine:hydrogen antiporter activity
	GO:0015312	polyamine:hydrogen antiporter activity
	GO:0015313	fluconazole:hydrogen antiporter activity
	GO:0015314	aminotriazole:hydrogen antiporter activity
	GO:0015315	organophosphate:inorganic phosphate antiporter activity
	GO:0015318	inorganic solute uptake transmembrane transporter activity
	GO:0015319	sodium:inorganic phosphate symporter activity
	GO:0015320	phosphate carrier activity
	GO:0015321	sodium-dependent phosphate transmembrane transporter activity
	GO:0015322	secondary active oligopeptide transmembrane transporter activity
	GO:0015324	peptide-acetyl-CoA secondary active transmembrane transporter activity
	GO:0015325	acetyl-CoA:CoA antiporter activity
	GO:0015326	cationic amino acid transmembrane transporter activity
	GO:0015327	cystine:glutamate antiporter activity
	GO:0015328	cystine secondary active transmembrane transporter activity
	GO:0015330	high affinity glutamine transmembrane transporter activity
	GO:0015333	peptide:hydrogen symporter activity
	GO:0015334	high affinity oligopeptide transporter activity
	GO:0015563	uptake transmembrane transporter activity
	GO:0015341	zinc efflux active transmembrane transporter activity
	GO:0015343	siderophore-iron transmembrane transporter activity
	GO:0015344	siderophore-iron (ferrioxamine) uptake transmembrane transporter activity
	GO:0015345	ferric enterobactin:hydrogen symporter activity
	GO:0015346	ferric triacetylfusarinine C:hydrogen symporter activity
	GO:0015347	sodium-independent organic anion transmembrane transporter activity
	GO:0015349	thyroid hormone transmembrane transporter activity
	GO:0015350	methotrexate transporter activity
	GO:0015351	bilirubin secondary active transmembrane transporter activity
	GO:0015352	secondary active sterol transmembrane transporter activity
	GO:0015353	multidrug endosomal transmembrane transporter activity
	GO:0015354	polyspecific organic cation transmembrane transporter activity
	GO:0015355	secondary active monocarboxylate transmembrane transporter activity
	GO:0015562	efflux transmembrane transporter activity
	GO:0050833	pyruvate transmembrane transporter activity
	GO:0015360	acetate:hydrogen symporter activity
	GO:0015361	low affinity sodium:dicarboxylate symporter activity
	GO:0015362	high affinity sodium:dicarboxylate symporter activity
	GO:0015364	dicarboxylate:inorganic phosphate antiporter activity
	GO:0015366	malate:hydrogen symporter activity
	GO:0015368	calcium:cation antiporter activity
	GO:0015369	calcium:hydrogen antiporter activity
	GO:0015370	solute:sodium symporter activity
	GO:0015371	galactose:sodium symporter activity
	GO:0015373	monovalent anion:sodium symporter activity
	GO:0015374	neutral, cationic amino acid:sodium:chloride symporter activity
	GO:0015375	glycine:sodium symporter activity
	GO:0015377	cation:chloride symporter activity
	GO:0015378	sodium:chloride symporter activity
	GO:0015379	potassium:chloride symporter activity
	GO:0015380	anion exchanger activity
	GO:0015381	high affinity sulfate transmembrane transporter activity
	GO:0015382	sodium:sulfate symporter activity
	GO:0015383	sulfate:bicarbonate antiporter activity
	GO:0015385	sodium:hydrogen antiporter activity
	GO:0015386	potassium:hydrogen antiporter activity
	GO:0015387	potassium:hydrogen symporter activity
	GO:0015388	potassium uptake transmembrane transporter activity
	GO:0015389	pyrimidine- and adenine-specific:sodium symporter activity
	GO:0015390	purine-specific nucleoside:sodium symporter activity
	GO:0015391	nucleobase:cation symporter activity
	GO:0015394	uridine:hydrogen ion symporter activity
	GO:0015395	nucleoside transmembrane transporter activity, down a concentration gradient
	GO:0015396	equilibrative nucleoside transmembrane transporter, nitrobenzyl-thioinosine-sensitive activity
	GO:0015397	equilibrative nucleoside transmembrane transporter, nitrobenzyl-thioinosine-insensitive activity
	GO:0015398	high affinity secondary active ammonium transmembrane transporter activity
	GO:0015399	primary active transmembrane transporter activity
	GO:0015400	low affinity secondary active ammonium transmembrane transporter activity
	GO:0015401	urea:sodium symporter activity
	GO:0015403	thiamin uptake transmembrane transporter activity
	GO:0015404	ion-gradient-driven energizer activity
	GO:0015405	P-P-bond-hydrolysis-driven transmembrane transporter activity
	GO:0015407	monosaccharide-transporting ATPase activity
	GO:0015408	ferric-transporting ATPase activity
	GO:0015410	manganese-transporting ATPase activity
	GO:0015411	taurine-transporting ATPase activity
	GO:0015412	molybdate transmembrane-transporting ATPase activity
	GO:0015413	nickel-transporting ATPase activity
	GO:0015414	nitrate transmembrane-transporting ATPase activity
	GO:0015415	phosphate transmembrane-transporting ATPase activity
	GO:0015416	phosphonate transmembrane-transporting ATPase activity
	GO:0015417	polyamine-transporting ATPase activity
	GO:0015418	quaternary-ammonium-compound-transporting ATPase activity
	GO:0015419	sulfate transmembrane-transporting ATPase activity
	GO:0015420	cobalamin-transporting ATPase activity
	GO:0015421	oligopeptide-transporting ATPase activity
	GO:0015422	oligosaccharide-transporting ATPase activity
	GO:0015423	maltose-transporting ATPase activity
	GO:0015424	amino acid-transporting ATPase activity
	GO:0015425	nonpolar-amino acid-transporting ATPase activity
	GO:0015426	polar-amino acid-transporting ATPase activity
	GO:0015430	glycerol-3-phosphate-transporting ATPase activity
	GO:0015431	glutathione S-conjugate-exporting ATPase activity
	GO:0015432	bile acid-exporting ATPase activity
	GO:0015433	peptide antigen-transporting ATPase activity
	GO:0015434	cadmium-transporting ATPase activity
	GO:0015436	capsular-polysaccharide-transporting ATPase activity
	GO:0015437	lipopolysaccharide-transporting ATPase activity
	GO:0015438	teichoic-acid-transporting ATPase activity
	GO:0015439	heme-transporting ATPase activity
	GO:0015440	peptide-transporting ATPase activity
	GO:0015441	beta-glucan-transporting ATPase activity
	GO:0046932	sodium-transporting ATP synthase activity, rotational mechanism
	GO:0015444	magnesium-importing ATPase activity
	GO:0015445	silver-exporting ATPase activity
	GO:0015446	arsenite transmembrane-transporting ATPase activity
	GO:0015450	P-P-bond-hydrolysis-driven protein transmembrane transporter activity
	GO:0015451	decarboxylation-driven active transmembrane transporter activity
	GO:0015452	methyl transfer-driven active transmembrane transporter activity
	GO:0015453	oxidoreduction-driven active transmembrane transporter activity
	GO:0015454	light-driven active transmembrane transporter activity
	GO:0015462	protein-transmembrane transporting ATPase activity
	GO:0015467	G-protein activated inward rectifier potassium channel activity
	GO:0015471	nucleoside-specific channel forming porin activity
	GO:0015473	fimbrial usher porin activity
	GO:0015474	autotransporter activity
	GO:0015475	adhesin autotransporter activity
	GO:0015476	hemaglutinin autotransporter activity
	GO:0015478	oligosaccharide transporting porin activity
	GO:0015481	maltose transporting porin activity
	GO:0015483	long-chain fatty acid transporting porin activity
	GO:0015486	glycoside-pentoside-hexuronide:cation symporter activity
	GO:0015487	melibiose:monovalent cation symporter activity
	GO:0015488	glucuronide:monovalent cation symporter activity
	GO:0015489	putrescine transmembrane transporter activity
	GO:0015490	cadaverine transmembrane transporter activity
	GO:0015491	cation:cation antiporter activity
	GO:0015492	phenylalanine:hydrogen symporter activity
	GO:0015493	lysine:hydrogen symporter activity
	GO:0015494	aromatic amino acid:hydrogen symporter activity
	GO:0015495	gamma-aminobutyric acid:hydrogen symporter activity
	GO:0015496	putrescine:ornithine antiporter activity
	GO:0015497	cadaverine:lysine antiporter activity
	GO:0015498	pantothenate:sodium symporter activity
	GO:0015499	formate transmembrane transporter activity
	GO:0015501	glutamate:sodium symporter activity
	GO:0015503	glutathione-regulated potassium exporter activity
	GO:0015504	cytosine:hydrogen ion symporter activity
	GO:0015505	uracil:cation symporter activity
	GO:0015506	nucleoside:hydrogen symporter activity
	GO:0015513	nitrite uptake transmembrane transporter activity
	GO:0015514	nitrite efflux transmembrane transporter activity
	GO:0015515	citrate:succinate antiporter activity
	GO:0015516	tartrate:succinate antiporter activity
	GO:0015518	arabinose:hydrogen symporter activity
	GO:0015519	D-xylose:hydrogen symporter activity
	GO:0015520	tetracycline:hydrogen antiporter activity
	GO:0015545	bicyclomycin transporter activity
	GO:0015546	sulfathiazole transporter activity
	GO:0045119	azole:hydrogen antiporter activity
	GO:0015522	hydrophobic uncoupler:hydrogen antiporter activity
	GO:0015523	arabinose efflux transmembrane transporter activity
	GO:0015547	nalidixic acid transporter activity
	GO:0015548	organomercurial transporter activity
	GO:0015549	carbonyl cyanide m-chlorophenylhydrazone transporter activity
	GO:0015526	hexose-phosphate:inorganic phosphate antiporter activity
	GO:0015527	glycerol-phosphate:inorganic phosphate antiporter activity
	GO:0015529	raffinose:hydrogen symporter activity
	GO:0015530	shikimate transmembrane transporter activity
	GO:0015531	citrate:hydrogen symporter activity
	GO:0015532	alpha-ketoglutarate:hydrogen symporter activity
	GO:0015533	shikimate:hydrogen symporter activity
	GO:0015535	fucose:hydrogen symporter activity
	GO:0015537	xanthosine:hydrogen ion symporter activity
	GO:0015538	sialic acid:hydrogen ion symporter activity
	GO:0015539	hexuronate:cation symporter activity
	GO:0015540	3-hydroxyphenyl propionate:hydrogen ion symporter activity
	GO:0015541	secondary active cyanate uptake transmembrane transporter activity
	GO:0015542	sugar efflux transmembrane transporter activity
	GO:0015544	phenyl propionate uptake uniporter activity
	GO:0015550	galacturonate transmembrane transporter activity
	GO:0015551	3-hydroxyphenyl propanoate transmembrane transporter activity
	GO:0015552	propionate transmembrane transporter activity
	GO:0015553	xanthosine transmembrane transporter activity
	GO:0015554	tartrate transmembrane transporter activity
	GO:0015555	acriflavine resistant pump activity
	GO:0015556	C4-dicarboxylate transmembrane transporter activity
	GO:0015557	arginine targeting transmembrane transporter activity
	GO:0015558	p-aminobenzoyl-glutamate uptake transmembrane transporter activity
	GO:0015559	multidrug efflux pump activity
	GO:0015568	L-idonate transmembrane transporter activity
	GO:0015561	rhamnose:hydrogen symporter activity
	GO:0015564	multidrug, alkane resistant pump activity
	GO:0015565	threonine efflux transmembrane transporter activity
	GO:0015566	acriflavine transporter activity
	GO:0015567	alkane transporter activity
	GO:0015569	p-aminobenzoyl-glutamate transmembrane transporter activity
	GO:0015570	energizer of outer membrane receptor-mediated transport activity
	GO:0015571	N-acetylgalactosamine transmembrane transporter activity
	GO:0015572	N-acetylglucosamine transmembrane transporter activity
	GO:0015573	beta-glucoside transmembrane transporter activity
	GO:0015574	trehalose transmembrane transporter activity
	GO:0015575	mannitol transmembrane transporter activity
	GO:0015576	sorbitol transmembrane transporter activity
	GO:0015577	galactitol transmembrane transporter activity
	GO:0015578	mannose transmembrane transporter activity
	GO:0015591	D-ribose transmembrane transporter activity
	GO:0015592	methylgalactoside transmembrane transporter activity
	GO:0015593	allose transmembrane transporter activity
	GO:0015594	putrescine-importing ATPase activity
	GO:0015595	spermidine-importing ATPase activity
	GO:0015598	arginine-importing ATPase activity
	GO:0015599	glutamine-importing ATPase activity
	GO:0015626	L-diaminopimelate transmembrane transporter activity
	GO:0015603	iron chelate transmembrane transporter activity
	GO:0015604	phosphonate transmembrane transporter activity
	GO:0015605	organophosphate ester transmembrane transporter activity
	GO:0015606	spermidine transmembrane transporter activity
	GO:0015607	fatty acyl CoA transporter activity
	GO:0015608	carbohydrate-importing ATPase activity
	GO:0015609	maltooligosaccharide-importing ATPase activity
	GO:0015610	glycerol phosphate-importing ATPase activity
	GO:0015611	D-ribose-importing ATPase activity
	GO:0015612	L-arabinose-importing ATPase activity
	GO:0015614	D-xylose-importing ATPase activity
	GO:0015615	D-allose-importing ATPase activity
	GO:0015619	thiamin pyrophosphate-transporting ATPase activity
	GO:0015620	ferric-enterobactin transmembrane transporter activity
	GO:0015621	ferric triacetylfusarinine C transmembrane transporter activity
	GO:0015622	ferric-hydroxamate transmembrane transporter activity
	GO:0015623	iron-chelate-transporting ATPase activity
	GO:0015624	ferric-enterobactin-transporting ATPase activity
	GO:0015625	ferric-hydroxamate-transporting ATPase activity
	GO:0015633	zinc transporting ATPase activity
	GO:0015634	lipopolysaccharide exporter activity
	GO:0015635	short-chain fatty acid transporter activity
	GO:0015636	short-chain fatty acid uptake transporter activity
	GO:0015638	microcin uptake permease activity
	GO:0015639	ferrous iron uptake transmembrane transporter activity
	GO:0015640	peptidoglycan peptide transporter activity
	GO:0015647	peptidoglycan transporter activity
	GO:0015648	lipid-linked peptidoglycan transporter activity
	GO:0015649	2-keto-3-deoxygluconate:hydrogen symporter activity
	GO:0015650	lactate:hydrogen symporter activity
	GO:0015651	quaternary ammonium group transmembrane transporter activity
	GO:0015652	quaternary ammonium group:hydrogen symporter activity
	GO:0015653	glycine betaine:hydrogen symporter activity
	GO:0015654	tellurite uptake transmembrane transporter activity
	GO:0015655	alanine:sodium symporter activity
	GO:0015657	branched-chain amino acid:sodium symporter activity
	GO:0015658	branched-chain aliphatic amino acid transmembrane transporter activity
	GO:0015659	formate uptake transmembrane transporter activity
	GO:0015660	formate efflux transmembrane transporter activity
	GO:0015661	L-lysine efflux transmembrane transporter activity
	GO:0015663	nicotinamide mononucleotide transmembrane transporter activity
	GO:0015665	alcohol transmembrane transporter activity
	GO:0015932	nucleobase, nucleoside, nucleotide and nucleic acid transmembrane transporter activity
	GO:0016286	small conductance calcium-activated potassium channel activity
	GO:0016463	zinc-exporting ATPase activity
	GO:0016464	chloroplast protein-transporting ATPase activity
	GO:0016820	hydrolase activity, acting on acid anhydrides, catalyzing transmembrane movement of substances
	GO:0016933	extracellular-glycine-gated ion channel activity
	GO:0016934	extracellular-glycine-gated chloride channel activity
	GO:0017032	potassium:amino acid symporter activity
	GO:0017077	oxidative phosphorylation uncoupler activity
	GO:0017089	glycolipid transporter activity
	GO:0017107	anion exchanger adaptor activity
	GO:0017127	cholesterol transporter activity
	GO:0017128	phospholipid scramblase activity
	GO:0017153	sodium:dicarboxylate symporter activity
	GO:0019182	histamine-gated chloride channel activity
	GO:0019191	cellobiose transmembrane transporter activity
	GO:0019194	sorbose transmembrane transporter activity
	GO:0019196	galactosamine transmembrane transporter activity
	GO:0019531	oxalate transmembrane transporter activity
	GO:0019534	toxin transporter activity
	GO:0019535	ferric-vibriobactin transmembrane transporter activity
	GO:0019793	ISG15 carrier activity
	GO:0022803	passive transmembrane transporter activity
	GO:0022804	active transmembrane transporter activity
	GO:0022809	mobile ion carrier activity
	GO:0022810	membrane potential driven uniporter activity
	GO:0022814	facilitated diffusion
	GO:0022815	large uncharged polar molecule transmembrane transporter activity
	GO:0022818	sodium ion uniporter activity
	GO:0022819	potassium ion uniporter activity
	GO:0022820	potassium ion symporter activity
	GO:0022821	potassium ion antiporter activity
	GO:0022824	transmitter-gated ion channel activity
	GO:0043682	copper-transporting ATPase activity
	GO:0022828	phosphorylation-gated channel activity
	GO:0022829	wide pore channel activity
	GO:0022831	narrow pore, gated channel activity
	GO:0022832	voltage-gated channel activity
	GO:0022833	mechanically gated channel activity
	GO:0022834	ligand-gated channel activity
	GO:0022835	transmitter-gated channel activity
	GO:0022836	gated channel activity
	GO:0022838	substrate specific channel activity
	GO:0022839	ion gated channel activity
	GO:0022840	leak channel activity
	GO:0022841	potassium ion leak channel activity
	GO:0022842	narrow pore channel activity
	GO:0022843	voltage-gated cation channel activity
	GO:0022848	acetylcholine-gated cation channel activity
	GO:0022849	glutamate-gated calcium ion channel activity
	GO:0022850	serotonin-gated cation channel activity
	GO:0022851	GABA-gated chloride ion channel activity
	GO:0022852	glycine-gated chloride ion channel activity
	GO:0022853	active ion transmembrane transporter activity
	GO:0022854	active large uncharged polar molecule transmembrane transporter activity
	GO:0022855	protein-N(PI)-phosphohistidine-glucose phosphotransferase system transporter activity
	GO:0022856	protein-N(PI)-phosphohistidine-sorbitol phosphotransferase system transporter activity
	GO:0022858	alanine transmembrane transporter activity
	GO:0022859	dephosphorylation-gated channel activity
	GO:0022865	transmembrane electron transfer carrier
	GO:0022866	transmembrane o1-electron transfer carrier
	GO:0022867	transmembrane 2-electron transfer carrier
	GO:0022869	protein-N(PI)-phosphohistidine-lactose phosphotransferase system transporter activity
	GO:0022870	protein-N(PI)-phosphohistidine-mannose phosphotransferase system transporter activity
	GO:0022871	protein-N(PI)-phosphohistidine-sorbose phosphotransferase system transporter activity
	GO:0022872	protein-N(PI)-phosphohistidine-mannitol phosphotransferase system transmembrane transporter activity
	GO:0022873	protein-N(PI)-phosphohistidine-maltose phosphotransferase system transporter activity
	GO:0022874	protein-N(PI)-phosphohistidine-cellobiose phosphotransferase system transporter activity
	GO:0022875	protein-N(PI)-phosphohistidine-galactitol phosphotransferase system transmembrane transporter activity
	GO:0022876	protein-N(PI)-phosphohistidine-galactosamine phosphotransferase system transporter activity
	GO:0022877	protein-N(PI)-phosphohistidine-fructose phosphotransferase system transporter activity
	GO:0022878	protein-N(PI)-phosphohistidine-sucrose phosphotransferase system transporter activity
	GO:0022879	protein-N(PI)-phosphohistidine-trehalose phosphotransferase system transporter activity
	GO:0022880	protein-N(PI)-phosphohistidine-N-acetylglucosamine phosphotransferase system transporter activity
	GO:0022881	protein-N(PI)-phosphohistidine-N-acetylgalactosamine phosphotransferase system transporter activity
	GO:0022882	protein-N(PI)-phosphohistidine-beta-glucoside phosphotransferase system transporter activity
	GO:0022883	zinc efflux transmembrane transporter activity
	GO:0022884	macromolecule transmembrane transporter activity
	GO:0022885	bacteriocin transmembrane transporter activity
	GO:0022886	channel-forming ionophore activity
	GO:0022889	serine transmembrane transporter activity
	GO:0022890	inorganic cation transmembrane transporter activity
	GO:0022891	substrate-specific transmembrane transporter activity
	GO:0022892	substrate-specific transporter activity
	GO:0022893	low-affinity tryptophan transmembrane transporter activity
	GO:0022894	Intermediate conductance calcium-activated potassium channel activity
	GO:0022897	proton-dependent peptide secondary active transmembrane transporter activity
	GO:0030171	voltage-gated proton channel activity
	GO:0030184	nitric oxide transporter activity
	GO:0030233	deoxynucleotide transmembrane transporter activity
	GO:0030504	inorganic diphosphate transmembrane transporter activity
	GO:0031263	amine-transporting ATPase activity
	GO:0031458	betaine-transporting ATPase activity
	GO:0031459	glycine betaine-transporting ATPase activity
	GO:0031924	vitamin B6 transporter activity
	GO:0031925	pyridoxal transmembrane transporter activity
	GO:0031926	pyridoxal phosphate transmembrane transporter activity
	GO:0031927	pyridoxamine transmembrane transporter activity
	GO:0031928	pyridoxine transmembrane transporter activity
	GO:0032146	thiosulfate transmembrane-transporting ATPase activity
	GO:0032217	riboflavin transporter activity
	GO:0032518	amino acid-exporting ATPase activity
	GO:0032519	cysteine-exporting ATPase activity
	GO:0032520	amino acid-importing ATPase activity
	GO:0032521	D-methionine-exporting ATPase activity
	GO:0032522	D-methionine-importing ATPase activity
	GO:0032523	silicon efflux transmembrane transporter activity
	GO:0032778	cobalt-transporting ATPase activity
	GO:0032977	membrane insertase activity
	GO:0033154	oligogalacturonide transporting ATPase activity
	GO:0033155	oligogalacturonide transmembrane transporter activity
	GO:0033220	amide-transporting ATPase activity
	GO:0033221	urea-transporting ATPase activity
	GO:0033224	2-aminoethylphosphonate transmembrane transporter activity
	GO:0033225	2-aminoethylphosphonate transporting ATPase activity
	GO:0033229	cysteine transmembrane transporter activity
	GO:0033230	cysteine-transporting ATPase activity
	GO:0033232	D-methionine-transporting ATPase activity
	GO:0033266	choline-transporting ATPase activity
	GO:0033283	organic acid-transporting ATPase activity
	GO:0033284	carboxylic acid-transporting ATPase activity
	GO:0033285	monocarboxylic acid-transporting ATPase activity
	GO:0033286	ectoine-transporting ATPase activity
	GO:0033287	hydroxyectoine transmembrane transporter activity
	GO:0033288	hydroxyectoine-transporting ATPase activity
	GO:0033297	rhamnose-transporting ATPase activity
	GO:0033300	dehydroascorbic acid transporter activity
	GO:0033569	lactoferrin transmembrane transporter activity
	GO:0033570	transferrin transmembrane transporter activity
	GO:0034040	lipid-transporting ATPase activity
	GO:0034041	sterol-transporting ATPase activity
	GO:0034202	glycolipid-translocating activity
	GO:0034215	thiamin:hydrogen symporter activity
	GO:0034216	high-affinity thiamin:hydrogen symporter activity
	GO:0034228	ethanolamine transmembrane transporter activity
	GO:0034257	nicotinamide riboside transporter activity
	GO:0034290	holin activity
	GO:0034291	canonical holin activity
	GO:0034292	pinholin activity
	GO:0034437	glycoprotein transporter activity
	GO:0034590	L-hydroxyproline transmembrane transporter activity
	GO:0034632	retinol transporter activity
	GO:0034634	glutathione transmembrane transporter activity
	GO:0034639	L-amino acid efflux transmembrane transporter activity
	GO:0034658	isopropylmalate transmembrane transporter activity
	GO:0042625	ATPase activity, coupled to transmembrane movement of ions
	GO:0042876	aldarate transmembrane transporter activity
	GO:0042877	D-galactarate transmembrane transporter activity
	GO:0042878	D-glucarate transmembrane transporter activity
	GO:0042879	aldonate transmembrane transporter activity
	GO:0042880	D-glucuronate transmembrane transporter activity
	GO:0042881	D-galactonate transmembrane transporter activity
	GO:0042888	molybdenum ion transmembrane transporter activity
	GO:0042890	3-phenylpropionic acid transmembrane transporter activity
	GO:0042895	antibiotic transporter activity
	GO:0042896	chloramphenicol transporter activity
	GO:0042897	polymyxin transporter activity
	GO:0042898	fosmidomycin transporter activity
	GO:0042900	arabinose transmembrane transporter activity
	GO:0042901	arabinose polymer transmembrane transporter activity
	GO:0042907	xanthine transmembrane transporter activity
	GO:0042910	xenobiotic transporter activity
	GO:0042911	acridine transporter activity
	GO:0042912	colicin transmembrane transporter activity
	GO:0042913	group A colicin transmembrane transporter activity
	GO:0042917	alkylphosphonate transmembrane transporter activity
	GO:0042925	benzoate transporter activity
	GO:0042926	3-hydroxyphenylpropionic acid transporter activity
	GO:0042927	siderophore transporter activity
	GO:0042929	ferrichrome transporter activity
	GO:0042931	enterobactin transporter activity
	GO:0042933	chrysobactin transporter activity
	GO:0042934	achromobactin transporter activity
	GO:0042936	dipeptide transporter activity
	GO:0042937	tripeptide transporter activity
	GO:0042943	D-amino acid transmembrane transporter activity
	GO:0042944	D-alanine transmembrane transporter activity
	GO:0042945	D-serine transmembrane transporter activity
	GO:0042947	glucoside transmembrane transporter activity
	GO:0042950	salicin transmembrane transporter activity
	GO:0042951	arbutin transmembrane transporter activity
	GO:0042954	lipoprotein transporter activity
	GO:0042957	dextrin transmembrane transporter activity
	GO:0042958	maltodextrin transmembrane transporter activity
	GO:0042959	alkanesulfonate transporter activity
	GO:0042960	antimonite secondary active transmembrane transporter activity
	GO:0042961	antimonite-transporting ATPase activity
	GO:0042962	acridine:hydrogen antiporter activity
	GO:0042970	homoserine transmembrane transporter activity
	GO:0042971	lactone transporter activity
	GO:0043211	carbohydrate-transporting ATPase activity
	GO:0043212	carbohydrate-exporting ATPase activity
	GO:0043214	bacteriocin-transporting ATPase activity
	GO:0043216	daunorubicin-transporting ATPase activity
	GO:0043225	anion transmembrane-transporting ATPase activity
	GO:0043250	sodium-dependent organic anion transmembrane transporter activity
	GO:0043563	odorant transporter activity
	GO:0043854	cyclic nucleotide-gated mechanosensitive ion channel activity
	GO:0043855	cyclic nucleotide-gated ion channel activity
	GO:0043858	arginine:ornithine antiporter activity
	GO:0043861	agmatine:putrescine antiporter activity
	GO:0043862	arginine:agmatine antiporter activity
	GO:0043865	methionine transmembrane transporter activity
	GO:0043872	lysine:cadaverine antiporter activity
	GO:0043879	glycolate transmembrane transporter activity
	GO:0043882	malate:sodium symporter activity
	GO:0043887	melibiose:sodium symporter activity
	GO:0043893	acetate:cation symporter activity
	GO:0045118	azole transporter activity
	GO:0046583	cation efflux transmembrane transporter activity
	GO:0046609	voltage-gated sulfate antiporter activity
	GO:0046623	sphingolipid-translocating ATPase activity
	GO:0046624	sphingolipid transporter activity
	GO:0046715	boron transporter activity
	GO:0046915	transition metal ion transmembrane transporter activity
	GO:0046943	carboxylic acid transmembrane transporter activity
	GO:0046964	3'-phosphoadenosine 5'-phosphosulfate transmembrane transporter activity
	GO:0048249	high affinity phosphate transmembrane transporter activity
	GO:0048474	D-methionine transmembrane transporter activity
	GO:0048502	thiamin-transporting ATPase activity
	GO:0048763	calcium-induced calcium release activity
	GO:0051032	nucleic acid transmembrane transporter activity
	GO:0051033	RNA transmembrane transporter activity
	GO:0051034	tRNA transmembrane transporter activity
	GO:0051035	DNA transmembrane transporter activity
	GO:0051139	metal ion:hydrogen antiporter activity
	GO:0051185	coenzyme transporter activity
	GO:0051407	glycerone phosphate:inorganic phosphate antiporter activity
	GO:0051408	glyceraldehyde 3-phosphate:inorganic phosphate antiporter activity
	GO:0051471	ectoine transmembrane transporter activity
	GO:0051474	glucosylglycerol transmembrane transporter activity
	GO:0051477	mannosylglycerate transmembrane transporter activity
	GO:0051724	NAD transporter activity
	GO:0051739	ammonia transporter activity
	GO:0051978	lysophospholipid transporter activity
	GO:0051980	iron-nicotianamine transmembrane transporter activity
	GO:0051981	copper chelate transmembrane transporter activity
	GO:0051982	copper-nicotianamine transmembrane transporter activity
	GO:0055053	mannose:hydrogen symporter activity
	GO:0055054	fructose:hydrogen symporter activity
	GO:0055055	D-glucose:hydrogen symporter activity
	GO:0055056	D-glucose transmembrane transporter activity
	GO:0055077	gap junction hemi-channel activity
	GO:0060072	large conductance calcium-activated potassium channel activity
	GO:0070089	chloride-activated potassium channel activity
	GO:0070812	glycerol-2-phosphate-transporting ATPase activity
	GO:0070835	chromium ion transmembrane transporter activity
	GO:0080054	low affinity nitrate transmembrane transporter activity
	GO:0080122	AMP transmembrane transporter activity
	GO:0080138	boron uptake transmembrane transporter activity
	GO:0080139	boron efflux transmembrane transporter activity
